1 **Improved temporal resolution for mapping brain metabolism using functional PET and**  
2 **anatomical MRI knowledge**

3

4 Viswanath P. Sudarshan<sup>1,2,3</sup>, Shenpeng Li<sup>4</sup>, Sharna D. Jamadar<sup>4,5,6</sup>, Gary F. Egan<sup>4,5,6</sup>, Suyash P.  
5 Awate<sup>2</sup> and Zhaolin Chen<sup>4</sup>

6 <sup>1</sup>Department of Electrical and Computer Systems Engineering, Monash University, Melbourne,  
7 Victoria, Australia

8 <sup>2</sup>Department of Computer Science and Engineering, IIT Bombay, Mumbai, India

9 <sup>13</sup>IITB-Monash Research Academy, Mumbai

10 <sup>4</sup>Monash Biomedical Imaging, Monash University, Melbourne, Victoria, Australia

11 <sup>5</sup>Australian Research Council Centre of Excellence for Integrative Brain Function, Melbourne,  
12 Victoria, Australia

13 <sup>6</sup>Turner Institute for Brain and Mental Health, Monash University, Melbourne, Victoria, Australia.

14

15 Corresponding to:

16 Viswanath P. Sudarshan

17 Indian Institute of Technology (IIT) Bombay, India,

18 Monash University, Australia

19

20 E: [psvish@cse.iitb.ac.in](mailto:psvish@cse.iitb.ac.in), [viswanath.pamulakantysudarshan@monash.edu](mailto:viswanath.pamulakantysudarshan@monash.edu)

---

21 Key words: MRI-PET, functional PET, fPET, dynamic FDG-PET, ICA, temporal resolution,  
22 denoising, partial volume error, brain metabolism

23

24 **Abstract**

25 Functional positron emission tomography (fPET) imaging using continuous infusion of [18F]-  
26 fluorodeoxyglucose (FDG) is a novel neuroimaging technique to track dynamic glucose utilization  
27 in the brain. In comparison to conventional static PET, fPET maintains a sustained supply of  
28 glucose in the blood plasma which improves sensitivity to measure dynamic glucose changes in  
29 the brain, and enables mapping of dynamic brain activity in task-based and resting-state fPET  
30 studies. However, there is a trade-off between temporal resolution and spatial noise due to the low  
31 concentration of FDG and the limited sensitivity of multi-ring PET scanners. Images from fPET  
32 studies suffer from partial volume errors and residual scatter noise that may cause the cerebral  
33 metabolic functional maps to be biased. Gaussian smoothing filters used to denoise the fPET  
34 images are suboptimal, as they introduce additional partial volume errors. In this work, a post-  
35 processing framework based on a magnetic resonance (MR) Bowsher-like prior was used to  
36 improve the spatial and temporal signal to noise characteristics of the fPET images. The  
37 performance of the MR guided method was compared with conventional Gaussian filtering using  
38 both simulated and *in vivo* task fPET datasets. The results demonstrate that the MR guided fPET  
39 framework reduces the partial volume errors, enhances the sensitivity of identifying brain  
40 activation, and improves the anatomical accuracy for mapping changes of brain metabolism in  
41 response to a visual stimulation task. The framework extends the use of functional PET to  
42 investigate the dynamics of brain metabolic responses for faster presentation of brain activation  
43 tasks, and for applications in low dose PET imaging.

## 44 **1 Introduction**

45 Brain imaging using positron emission tomography (PET) can provide unique insights into brain  
46 function in both healthy individuals and individuals with neuropathological conditions (Nasrallah  
47 & Dubroff, 2013). [18F]-fluorodeoxyglucose (FDG)-PET imaging has long been a proxy for  
48 regional and global brain metabolism, as glucose uptake is closely correlated with the underlying  
49 neuronal activity (Figley & Stroman, 2011; Phelps et al., 1979; Reivich et al., 1985). Conventional  
50 static FDG-PET based on a bolus injection of the radiotracer provides a snapshot of glucose  
51 metabolism over a long time-window (equal to the scan duration, usually 10-30 minutes). Dynamic  
52 PET imaging using a bolus administration of radiotracer provides an opportunity to model tracer  
53 kinetics in the brain. However, conventional bolus injection FDG PET scans are not sensitive to  
54 cerebral metabolic changes over an extended time duration due to lack of sustained supply of FDG  
55 to the brain (Villien et al., 2014). To circumvent this problem, Villien et al. (2014) used a  
56 continuous infusion radiotracer infusion approach, together with dynamic PET scanning, to  
57 achieve enhanced sensitivity for tracking dynamic radiotracer uptake. This constant infusion  
58 approach using FDG was labelled ‘functional’ PET (fPET), to highlight similarities to the  
59 functional magnetic resonance imaging (fMRI) technique. Subsequent research using fPET  
60 methodology has shown promising results for isolating brain functional areas during external tasks  
61 and at rest (Hahn et al., 2016, 2018; Jamadar et al., 2019; Li et al., 2020; Rischka et al., 2018).  
62 Despite great improvement in temporal resolution in comparison to traditional approaches, the  
63 temporal resolution of fPET remains substantially lower than that of fMRI, which is in the order  
64 of seconds or even sub seconds. The current temporal resolution of fPET (around 20-60 seconds)  
65 limits the opportunity to use fPET for detailed investigations of brain metabolic responses to  
66 rapidly switching tasks and brain stimulation paradigms.

67 Analysis of fPET data is challenging because of the relatively poor signal to noise ratio (SNR) and  
68 partial volume errors in the reconstructed PET images (Z Chen et al., 2018). Recent work has  
69 improved the SNR in fPET by applying a combined bolus and continuous infusion of radiotracer  
70 during experiments (Jamadar et al., 2019; Rischka et al., 2018). However, the statistical power of  
71 these experimental approaches is still relatively low when compared with fMRI. To mitigate this  
72 issue, spatial smoothing of the reconstructed PET images is performed prior to functional analysis  
73 of the brain using techniques such as independent component analysis (ICA). Gaussian smoothing  
74 is widely used as a post-reconstruction spatial and temporal smoothing operation for functional  
75 neuroimaging analyses (Zikuan Chen & Calhoun, 2018; Hahn et al., 2018; Jamadar et al., 2019;  
76 Pignat et al., 2013; Villien et al., 2014). However, the Gaussian kernel acts as a low-pass filter,  
77 and therefore, further worsens the partial volume errors in fPET images; this can cause errors in  
78 the localisation and quantification of brain functional activations and at high-temporal resolution  
79 fPET imaging. MRI-based PET reconstruction methods have shown substantial improvement in  
80 PET image quality compared to conventional methods (Z Chen et al., 2018; V.P. Sudarshan, Chen,  
81 & Awate, 2018; Viswanath P. Sudarshan, Egan, Chen, & Awate, 2020). For instance, several  
82 studies have explored post-reconstruction PET image enhancement using anatomical information  
83 from structural MRI (Bousse et al., 2012; Hutton et al., 2013; Schramm et al., 2018) to perform  
84 partial volume correction and image deblurring (Dutta, Leahy, & Li, 2013; Song et al., 2019). The  
85 Bayesian formulation of MRI assisted PET denoising can be interpreted as a guided filter to  
86 address the PET denoising and partial volume error problems, by modelling the statistical  
87 dependencies across the PET and MRI images in order to delineate tissue boundaries.

88 Loeb et al. (2015) proposed a variant of the well-known Bowsher prior (Bowsher et al., 1996),  
89 modelled as prior information in the reconstruction process. The Bowsher prior, in principle, is a

90 weighted Markov random field (MRF) model which promotes delineation of PET image voxels  
91 that are dissimilar according to the intensities in the spatially co-registered MRI image. The  
92 weights are computed based on a similarity metric (e.g. absolute difference) evaluated on the  
93 structural image. Subsequently, Schramm et al. (2018) proposed an asymmetrical variant of the  
94 original Bowsher prior and demonstrated that the asymmetrical version yielded PET image  
95 reconstruction with improved bias-variance trade-off in comparison to other image gradient-based  
96 priors such as parallel level sets (Ehrhardt et al., 2015) and compared to the originally proposed  
97 Bowsher prior.

98 In the current study, we hypothesized that accurate identification of brain metabolic activations  
99 could be obtained by filtering the fPET images using knowledge from the anatomical MRI image.  
100 The anatomical information was modelled as an MRF prior within a Bayesian framework to restore  
101 the fPET signal. The anatomical prior was expected to improve the identification of independent  
102 signal components from the fPET data by improving the spatial and temporal SNR and reducing  
103 partial volume errors. The formulation of the prior model in this paper differed from the one  
104 proposed in (Loeb, Navab, & Ziegler, 2015; Schramm et al., 2018), in that it used a location-  
105 dependent smoothly-decaying function incorporating patch-level differences (as opposed to voxel-  
106 level differences) to estimate the weights within the neighbourhood of a voxel. The method is  
107 henceforth referred to as *MRI-MRF prior* and was validated using both simulated *in vivo* visual  
108 task fPET datasets. The accuracy of the method was compared with conventional smoothing  
109 methods at both the subject and group level ICA, and the *in vivo* fPET dynamic data were  
110 downsampled to verify the robustness of the proposed method in response to reduced task  
111 stimulation durations.

## 112 2 Methods and Experiments

### 113 2.1 Theory

114 Let  $\{u^t\}_{t=1}^T$  represent the dynamic sequence of  $T$  fPET images, each containing  $N$  voxels,  
115 reconstructed using model-based iterative methods such as maximum likelihood expectation-  
116 maximization (MLEM) (Shepp and Vardi 1982). To perform spatial ICA, we construct a  
117 spatiotemporal data matrix,  $Y$ , using  $\{u^t\}_{t=1}^T$ , such that the dimension of  $Y$  is  $T \times N$ . ICA models  
118  $Y$  as a linear combination of the underlying independent components:  $Y = AS$ , where  $S$  contains  
119 the independent components and  $A$  is the mixing matrix. In the context of PET imaging, the  
120 measured PET data is affected by the blurring matrix,  $H$  (Bousse et al., 2012; Zhu, Gao, &  
121 Rahmim, 2019), and the ICA model becomes

$$122 \quad Y_0 H = A S_0 H, \quad (1)$$

123 where  $Y_0$  represents the spatiotemporal matrix constructed from the true PET signals, and  $S_0$   
124 models the true underlying independent components of  $Y_0$ . The matrix,  $H$ , acting on the spatial  
125 dimension, models the partial volume errors in PET measurements, and hence, the resultant  
126 independent components through the mixing operation,  $A$ .

127 The goal of fPET data analysis is to identify  $S_0$  from Equation (1). Image denoising in the spatial  
128 domain is an important pre-processing step prior to application of the ICA algorithm. The  
129 characteristics of an ideal filter for estimation of the source components,  $S_0$ , would be to recover  
130 the signal without compromising the independence of the underlying true components. Typically,  
131 a Gaussian smoothing filter with a suitable width, specified by its full width at half maximum  
132 (FWHM) is used to reduce spatial noise, for example, during fMRI data analysis. However,  
133 performing a Gaussian smoothing can introduce additional bias in fPET images and the

134 corresponding independent components, due to worsening of the partial volume errors (Zikuan  
 135 Chen & Calhoun, 2018; Pignat et al., 2013). Hence, this work proposes an MRI guided filtering  
 136 scheme that can perform (i) denoising, as well as (ii) partial volume correction, to provide an  
 137 improved estimation of the underlying source components,  $S_0$ .

138 Given the sequence of fPET images,  $\{u^t\}_{t=1}^T$ , and the fixed MRI image,  $v$ , of the subject, the post-  
 139 reconstruction restored fPET image,  $u_0^t$ , can be obtained by solving the following optimization  
 140 problem independently for each frame:

$$141 \quad \widehat{u}_0^t = \arg \min_{u_0^t > 0} \|u^t - h * u_0^t\|_2^2 + \alpha \mathbf{R}(u_0^t | v) \quad (2)$$

142 Here  $\mathbf{R}(\cdot)$  represents the MRI-guided MRF (MRI-MRF) regularization function which  
 143 incorporates the anatomical information from MRI image,  $v$ . The kernel function  $h$  models PSF  
 144 for current estimate of the image,  $u_0^t$ . The parameter  $\alpha$  determines the strength of the regularization,  
 145  $\mathbf{R}(\cdot)$ . The formulation in Equation (1) is generic and allows incorporation of arbitrary prior models  
 146 that enforce certain type of regularity, e.g. piecewise smoothness, on the fPET images. In this work,  
 147 we model  $\mathbf{R}(\cdot)$  as a modified version of the asymmetrical Bowsher prior presented by Schramm  
 148 et al. (2018). Specifically,  $\mathbf{R}(\cdot)$  is modelled as a weighted quadratic MRF function defined as,  
 149  $\mathbf{R}(u | v) = \sum_{i \in I} \sum_{j \in I} w_{ij} (u_i - u_j)^2$ . Here the weights  $w_{ij}$  are computed based on the intensity  
 150 values from the co-registered MRI image,  $v$ , as

$$151 \quad w_{ij} = \exp\left(-\frac{\|N_i(v) - N_j(v)\|_1}{2\sigma_w^2}\right) / \sum_j \exp\left(-\frac{\|N_i(v) - N_j(v)\|_1}{2\sigma_w^2}\right)$$

152 where the operator  $N_i(\cdot)$  extracts a vectorized isotropic 3D patch of volume  $L^3 \text{ mm}^3$  centred  
 153 around voxel  $i$ , and the parameter  $\sigma_w$  determines the spatial pattern of weights within the patch in

154 the neighbourhood of voxel  $i$ . The strategy of determining the weights  $w_{ij}$  in the MRF-based  
155 regularization term by relying on patch-difference norms has been used within the literature on  
156 patch-based denoising methods, first proposed on natural images in the works of (Awate &  
157 Whitaker, 2005a; Buades, Coll, & Morel, 2005) and on MRI images in the works of (Awate &  
158 Whitaker, 2005b, 2007; Coupé, Manjón, Robles, & Collins, 2012). While a high value of  $\sigma_w$  leads  
159 to weights that are similar for all the neighbouring voxels, a low value of  $\sigma_w$  assigns higher weights  
160 to a few selected voxels in the neighbourhood. The latter scenario leads to an extension of the  
161 strategy in the asymmetric Bowsher prior (Schramm et al., 2018) that (i) enforces neighbourhood  
162 weights to be binary (1 or 0) and (ii) design weights only based on voxel-intensity differences  
163 (instead of patch differences). Our proposed strategy of using patch-based differences can provide  
164 additional robustness to noise and artefacts while leading to better structure preservation, in ways  
165 that are similar to those studied in general image denoising (Milanfar, 2012). While iterative  
166 denoising algorithms, as in (Awate & Whitaker, 2005a, 2006), offer algorithms for data-driven  
167 tuning of the parameter  $\sigma_w$  to improve performance, in the application in this manuscript, where  
168 the weights only need to be precomputed once, we tune the parameter  $\sigma_w$  based on validation on  
169 simulated data.

## 170 **2.2 Data and experiments**

171 Both simulated and *in vivo* fPET and MRI data were used to validate the performance of the MRI-  
172 MRF prior. For comparison, the MRI-MRF prior processed fPET images were compared with  
173 those obtained using Gaussian smoothing with varying kernel sizes (specified by FWHM).

### 174 **2.2.1 Simulated experiments and data**



175 Continuous infusion of FDG PET activity was simulated for 60 minutes using a two-tissue  
176 compartment model involving the three kinetic parameters  $k_1$ ,  $k_2$  and  $k_3$  and a fitted arterial input  
177 function from intravenous blood samples collected from our previous *in vivo* experimental data  
178 (Jamadar et al., 2019). The simulated FDG activity was corrected by the blood partition fraction  
179 and haematocrit using the same procedure as in our previous work (Li et al., 2020). Brain regions  
180 were segmented into grey matter, white matter and the occipital cortices using the MNI structural  
181 atlas (Mazziotta et al., 2001) using FSL (Diedrichsen, Balsters, Flavell, Cussans, & Ramnani,  
182 2009). The MRI and PET images were simulated with an isotropic spatial resolution of 2 mm in  
183 the MNI space. The regional specific metabolic kinetic parameters used for the simulated dataset  
184 were  $k_1 = 0.101$ ,  $k_2 = 0.071$ ,  $k_3 = 0.042$  for grey matter and  $k_1 = 0.047$ ,  $k_2 = 0.070$ ,  $k_3 =$   
185  $0.035$  for white matter, respectively (Lucignani et al., 1993). A visual task stimulus was simulated  
186 between 20 to 30 minutes in the visual cortex region similar to the *in vivo* experimental paradigm.  
187 During the visual stimulation period, the parameter  $k_3$  in the occipital cortex was simulated to  
188 have a 20% increment.

189 The tomographic iterative GPU-based reconstruction toolbox (TIGRE) was used for PET image  
190 reconstruction (Biguri, Dosanjh, Hancock, & Soleimani, 2016). The PET images were forward  
191 projected, and Poisson noise was applied in the measurement space, to generate a high-dose dataset.  
192 Subsequently, we simulated dynamic low-dose PET data using the Poisson thinning approach  
193 (Kim et al., 2018) such that the low-dose data had a dose reduction factor (DRF) of 100 compared  
194 to that of the high-dose data. The PET sinogram data were further smoothed in the sinogram space  
195 using a Gaussian filter with kernel size 2.35 mm to simulate the partial volume effect. Finally, the  
196 MLEM algorithm was used to reconstruct the PET images for the low and high dose datasets.

197 The reconstructed PET images,  $\{u^t\}_{t=1}^T$ , were registered to the corresponding MRI image,  $v$ . The  
198 Bayesian optimization problem with the MRI-MRF prior in Equation (2) was solved using limited  
199 memory BFGS method (L-BFGS) (Byrd, Lu, Nocedal, & Zhu, 1995), with positivity constraints.  
200 The ICA-specific pre-processing steps including spatial normalization and dimensionality  
201 reduction were performed as described in detail by Li et al. (2020) on the post-reconstruction  
202 smoothed images. In this work, we performed both subject-level and group-level ICA on fPET  
203 data. For group analysis, the spatiotemporal matrix from each subject was concatenated along the  
204 temporal dimension before the application of ICA. The pre-processed data, which was an estimate  
205 of  $Y_0$ , was then decomposed using an ICA unmixing algorithm in the FastICA toolbox (A.  
206 Hyvarinen & E. Oja, 2000; Hyvärinen & Oja, 1997).

### 207 **2.2.2 *In vivo* experiments and data**

208 A cohort of five healthy volunteers were scanned for a visual task stimulus experiment using a 3T  
209 Siemens Biograph mMR (Siemens Healthiness, Erlangen, Germany) PET-MRI scanner, approved  
210 by the institute human ethics committee. The overall stimulation protocol consisted of three visual  
211 stimulation periods consisting of alternating periods of rest and task blocks. A detailed description  
212 of the experiment is provided in our earlier work in (Jamadar et al., 2019). The subjects rested for  
213 a period of 20 minutes to allow sufficient FDG accumulation in the brain, during which structural  
214 MRI scans were acquired. Following this, the subjects viewed a circular flickering checkerboard  
215 stimulus for 10 minutes. The checkerboard was retained for a period of 120 seconds and  
216 subsequently, an intermittent 32 seconds on and 16 seconds off design was employed. Following  
217 the first task stimulation, which involved 3 blocks: rest, task, and rest, two other stimulation  
218 experiments, using the full checkerboard visual, were carried out. We used the PET data acquired  
219 during the first full checkerboard. Hence, the PET data for each subject was of 30-minute duration,

220 including 10 minutes resting before the stimulation, 10 minutes of a full checkboard stimulation  
221 followed by another 10 minutes of rest (Figure 3 (a)). The average dose of FDG given to each  
222 subject was  $95.9 \pm 5.9$  MBq which was infused at a constant rate of 36mL/hr over the 90-minute  
223 duration.

224 We reconstructed PET images from the list-mode data using two different values for the temporal  
225 bin-width ( $T_{bin}$ ) of (i) 30 seconds for the low-dose PET images, and (ii) 3 minutes for high-dose  
226 PET images. The average dose for the corresponding low dose fPET images across the group of  
227 subjects was calculated to be 7.5 kBq/kg/frame. The PET data was corrected for attenuation using  
228 a pseudo-computed tomography (pCT) map (Baran et al., 2018; Burgos et al., 2013). The corrected  
229 PET data sinograms were reconstructed using ordered subsets expectation maximization (OSEM)  
230 algorithm with 3 iterations and 21 subsets along with point spread function modelling. The PET  
231 3D volumes were reconstructed with voxel sizes of  $3 \times 3 \times 2.03$  mm<sup>3</sup>. For standard analysis, all  
232 the images were registered to the MNI-152 template. The high-dose PET images from the 3-minute  
233 binned data were used to register the low-dose PET images with the T1 weighted MRI (acquired  
234 at 1 mm<sup>3</sup> isotropic resolution) for each subject using ANTS (Avants et al., 2011).

235 We also undertook a comparison of the performance of the MRI-MRF and Gaussian filtering  
236 schemes when the duration of the task and resting blocks was reduced. This analysis was carried  
237 out by downsampling the total number of low-dose fPET images reconstructed from the list mode  
238 data. Functional PET analyses were computed at both the subject-level and group-level for  
239 downsampling factors (DF) of 2 and 3 to simulate fPET images of duration 30 secs but acquired  
240 at 1:00 minute and 1:40 minute intervals, respectively. The downsampled PET images correspond  
241 to reduced task duration with a lower number of temporal frames.

### 242 **2.2.3 Optimal kernel width selection**

243 The optimal kernel sizes for the Gaussian low pass filter and the MRI-MRF prior, for processing  
244 the *in vivo* data were selected and validated using simulated data. We optimized the parameters to  
245 achieve high sensitivity without substantial loss of specificity using ICA computed activation maps.  
246 For computing the sensitivity and specificity values, the region of interest (ROI), occipital cortex,  
247 was obtained using the segmentation procedure as described in Section 2.2.1. The sensitivity and  
248 specificity performance metrics defined as follows:

$$249 \quad \text{Sensitivity [\%]} = \frac{\text{number of activated voxels inside the ROI}}{\text{total number of voxels inside the ROI}} \times 100$$

$$250 \quad \text{Specificity [\%]} = \frac{\text{number of nonactivated voxels outside the ROI}}{\text{total number of voxels outside the ROI}} \times 100$$

251 provide a quantitative assessment of the activation maps (z-score map) obtained from the different  
252 filtering operations. The metrics were computed by considering a voxel as activated if  $|z| \geq 1.6$   
253 and  $|z| \geq 2.1$ , for subject-level and group-level analysis respectively (Li et al., 2020). The  
254 parameter search-space for the MRI-MRF prior, includes varying values of the regularization  
255 parameter, patch length ( $\alpha$ ,  $L$  respectively). On the other hand, for the Gaussian kernel, we varied  
256 the FWHM parameter which in turn determines the kernel size.

257

## 258 **3 Results**

### 259 **3.1. Results for simulated data**

260 Table 1 compares the sensitivity and specificity for both denoising schemes at different parameter  
261 configurations. For the MRI-MRF prior, the patch-length was varied from 10 mm to 18 mm which  
262 represented a varying patch size of 5 to 9 voxels in each direction, respectively. In the case of

263 *Table 1 Comparison of sensitivity and specificity of MRI-MRF and Gaussian smoothing filters.*  
264 *The sensitivity and specificity values at two different z-score threshold values are provided.*

| MRI-MRF   |                |                |                |                | Gaussian     |                |                |                |                |
|-----------|----------------|----------------|----------------|----------------|--------------|----------------|----------------|----------------|----------------|
| L<br>(mm) | Sensitivity    |                | Specificity    |                | FWHM<br>(mm) | Sensitivity    |                | Specificity    |                |
|           | $ z  \geq 1.6$ | $ z  \geq 2.1$ | $ z  \geq 1.6$ | $ z  \geq 2.1$ |              | $ z  \geq 1.6$ | $ z  \geq 2.1$ | $ z  \geq 1.6$ | $ z  \geq 2.1$ |
| 10        | 73.6           | 58.6           | 91.8           | 97.6           | 11           | 77.5           | 60.2           | 89.6           | 94.5           |
| 14        | 87.7           | 79.9           | 92.3           | 94.8           | 13           | 75.5           | 61.1           | 89.6           | 95.4           |
| 18        | 83.3           | 73.9           | 89.8           | 94.4           | 15           | 64.2           | 49.1           | 93.3           | 94.7           |

265  
266 Gaussian filtering, the kernel size was determined by the full width at half maximum of the  
267 Gaussian function. The FWHM for Gaussian varied from 11 mm to 15 mm. It is to be noted that  
268 while parameter  $L$  (for the MRI-MRF prior) represents the width of the entire kernel, FWHM (for  
269 the Gaussian filter) represents approximately half of the kernel-width. The parameter range chosen  
270 for the Gaussian smoothing is consistent with the Gaussian kernel widths used in the prior work  
271 (Li et al. 2020). The sensitivity values for the MRI-MRF processed image are dramatically higher  
272 than that of the Gaussian smoothed images, whereas the specificity values are comparable between  
273 the two methods. For the fPET data analysis, a patch-length of 14 mm was chosen for the MRI-  
274 MRF prior. However, both the Gaussian kernels with FWHM 11 mm and 13 mm show similar  
275 sensitivity and specificity values. Therefore, the analysis using the Gaussian-filtered *in vivo* fPET  
276 data was undertaken using both the 11 mm and 13 mm FWHM filters.

277 Figure 1 shows the visual task specific activation for the reference noiseless fPET images, and for  
278 the three denoising schemes using the optimal parameters chosen from Table 1. The ICA activation  
279 map obtained using the noiseless images serves as the reference map (Figure 1 (a)). The activation  
280 map obtained from post-reconstruction filtered fPET images using the MRI-MRF prior (Figure 1  
281 (b)) was closest to the reference activation map in the visual cortex. On the other hand, the  
282 activation maps obtained using Gaussian smoothing with both FWHMs yield suboptimal  
283 activation maps in the visual cortex with asymmetrical patterns.

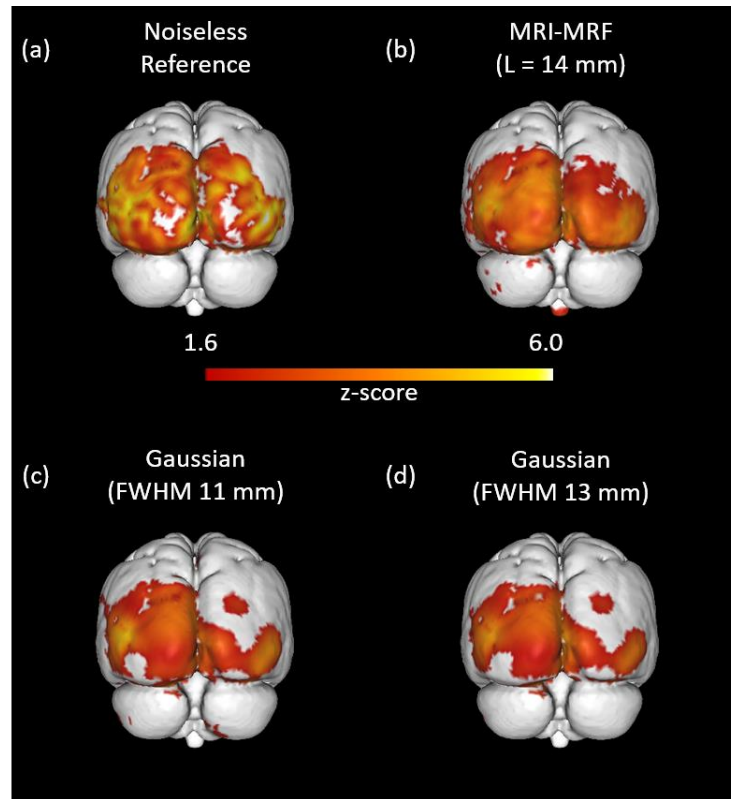

284

285 *Figure 1. Comparison of brain activation maps using the simulated data. Visualization of*  
286 *activation in the visual cortex using ICA on noiseless fPET images (a), MRI-MRF prior (b),*  
287 *Gaussian smoothing with FWHM 11 mm (c), and FWHM 13 mm (d).*

### 288 **3.2. Results for *in vivo* data**

289 The results reported in this section are for the fPET images reconstructed using the list-mode data  
290 binned at  $T_{bin} = 30$  s, and for  $DF = 1, 2$  and  $3$ .

291 Figure 2 shows the post-reconstruction filtered fPET images along with the subject's MRI image  
292 (Figure 2, left column) and the corresponding vendor provided low dose fPET image (Figure 2,  
293 second column). The denoised image using the MRI-MRF prior (Figure 2, third column) shows  
294 superior recovery of PET signals in different regions of the brain while removing substantial  
295 amount of noise. Specifically, the white and grey matter boundaries are well delineated, the shape  
296 of the ventricles has been recovered (which is not evident in the low dose PET image), and  
297 anatomical features in the gyri, sulci and details of the cortical folding (refer Figure 2m) have been

298 restored. On the other hand, the denoised images using both Gaussian kernels (FWHM 11 mm and  
299 13 mm) are heavily blurred and show substantial loss of anatomical details due to the partial  
300 volume errors (Figure 2, fourth and fifth columns).

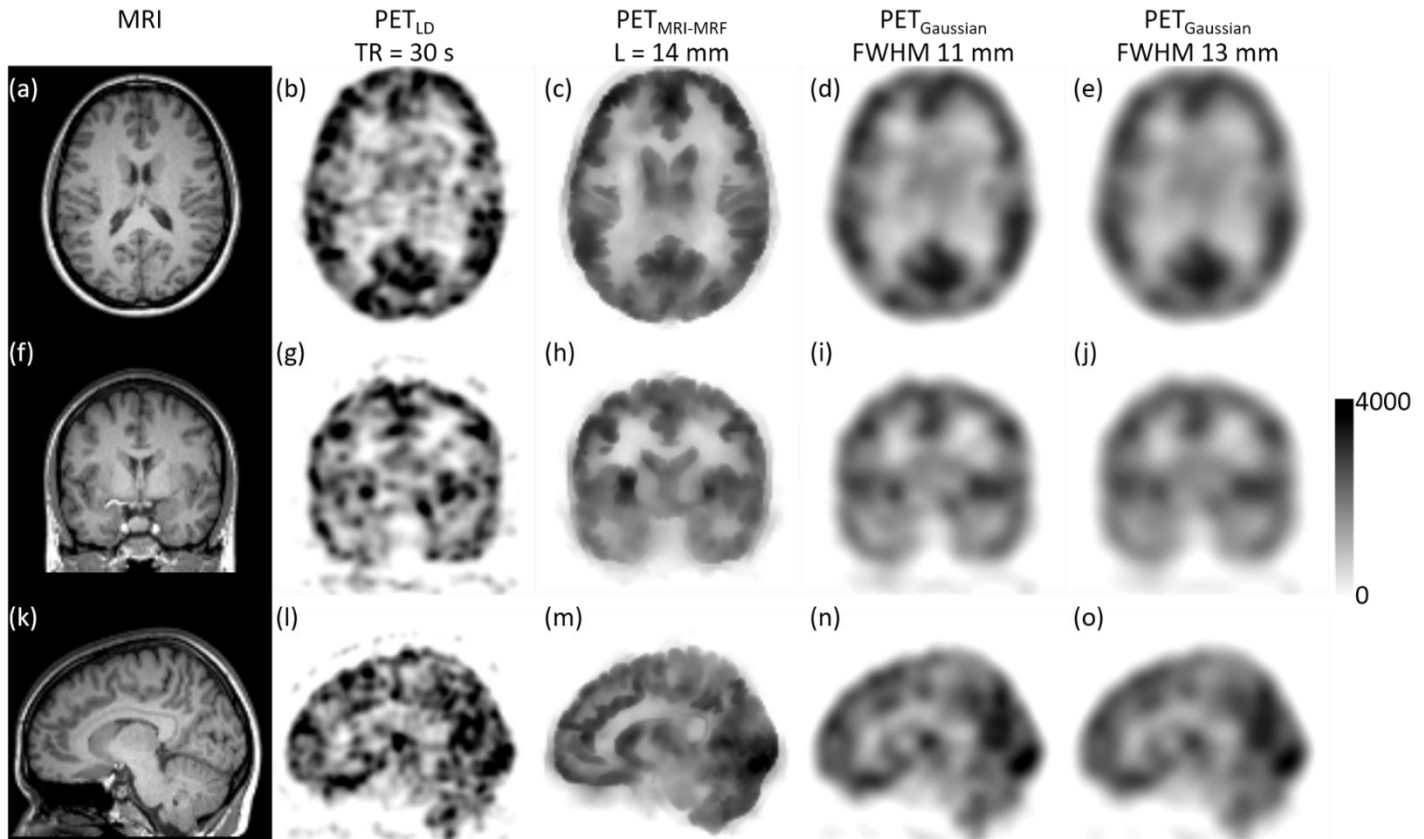

301  
302 *Figure 2. Assessment of the post-reconstruction smoothed fPET images with binning time of  $T_{bin}$*   
303 *= 30 s. The subject's MRI image (a); the vendor reconstructed PET image (b); the filtered image*  
304 *using the MRI-MRF prior ( $L = 14$  mm) (c); and using Gaussian kernels with FWHM (d) 11 mm,*  
305 *(e) 13 mm.*

306

307

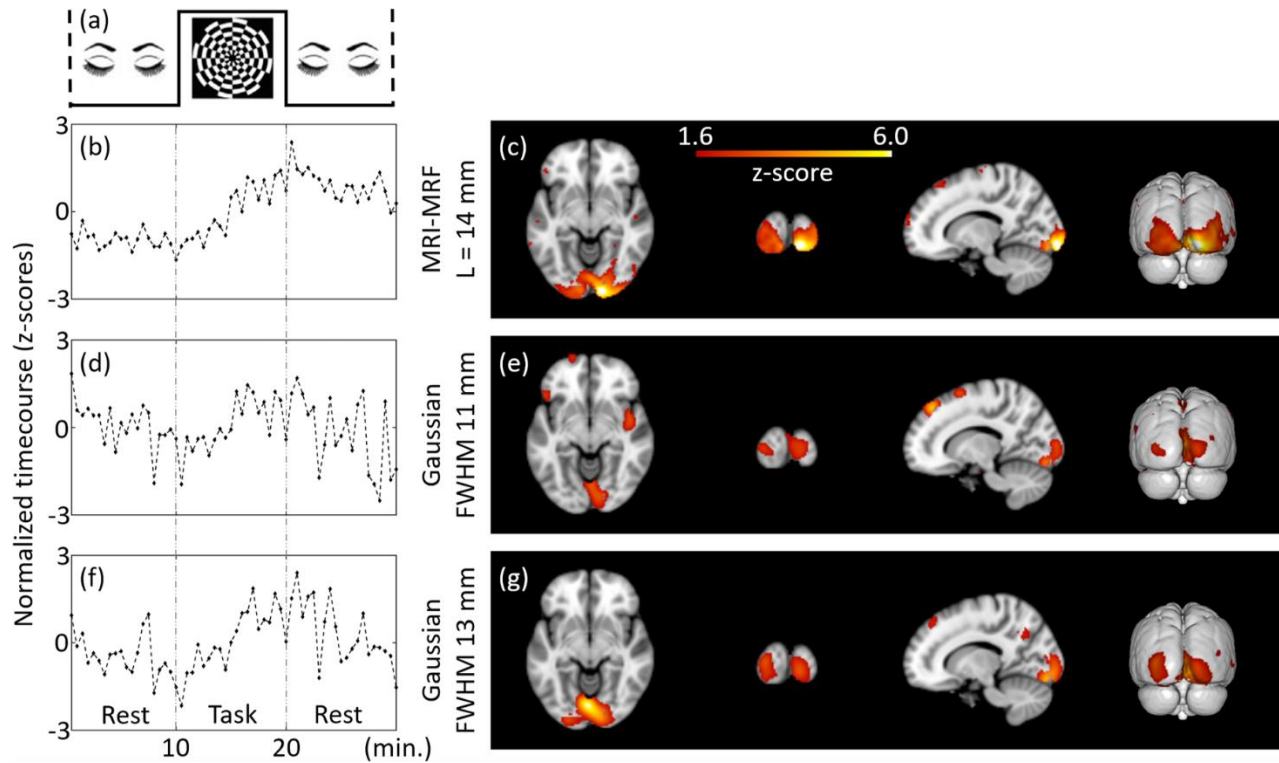

308

309 *Figure 3. Subject-level (representative) estimation of brain activations using ICA for  $T_{bin} = 30$  s*  
310 *and  $DF = 1$  at MNI co-ordinate (14, -94, -8). The independent components estimated from the*  
311 *filtered fPET images using different schemes are provided. The task paradigm is shown in (a). ICA*  
312 *maps and timecourses: top to bottom: MRI-MRF prior with  $L = 14$  mm (b) and (c), Gaussian*  
313 *smoothing with FWHM = 11 mm (d) and (e), Gaussian smoothing with FWHM 13 mm (f) and (g).*

314

315 Figure 3 shows the results of an individual subject-level fPET analysis obtained using different  
316 filtering techniques for a downsampling factor of one (i.e.  $DF=1$ , includes all list-mode data). The  
317 ICA activation maps corresponding to the visual task component along with the normalized  
318 timecourses (representing the z-scores) are calculated for each filtering method. The component  
319 maps for all sections of the brain are provided in the Supplementary material. The ICA timecourse  
320 for both Gaussian kernels (Figures 3d & 3f) are noisy and do not closely follow the experimental  
321 task paradigm. Moreover, the shape of the region of brain activation does not follow the known  
322 anatomical structure of the primary visual cortex but extends into adjacent neuroanatomical



323 structures including the white matter, likely due to large partial volume errors. Conversely, the  
324 activation map obtained using the MRI-MRF prior (Figure 3c) shows localized activity near the  
325 visual cortex with a significantly higher z-score within the visual cortex compared to both  
326 Gaussian kernels. The ICA timecourse for the MRI-MRF prior (Figure 3b) accords more closely  
327 with the experimental design with increased uptake during the visual task block. The comparison  
328 of the visual task components for the three methods for all brain sections is consistent with these  
329 observations (see Supplementary material).

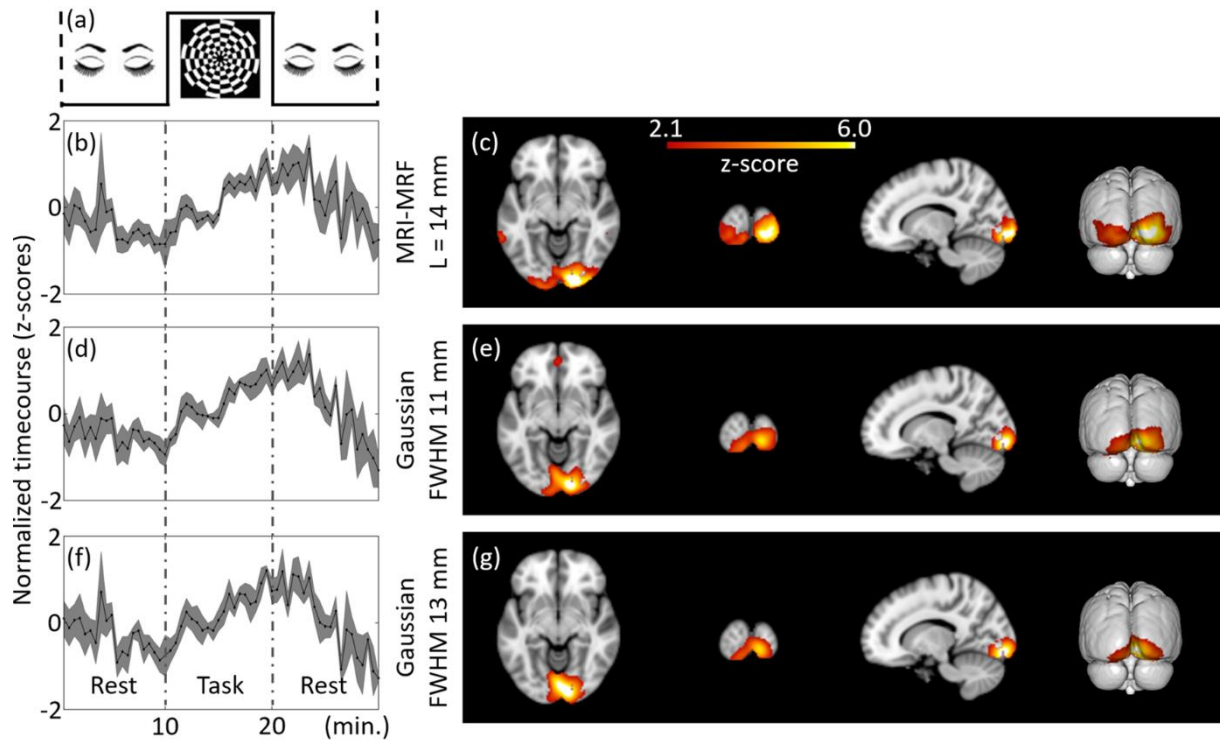

331 *Figure 4. Group-level estimation of brain activations using ICA for  $T_{bin} = 30$  s and  $DF = 1$  at*  
332 *MNI co-ordinate (14, -94, -8). The independent components estimated from the filtered fPET*  
333 *images using different schemes are provided. The task paradigm followed for the group study is*  
334 *shown in (a). ICA maps and timecourses: top to bottom: MRI-MRF prior with  $L = 14$  mm (b) and*  
335 *(c), Gaussian smoothing with  $FWHM = 11$  mm (d) and (e), Gaussian smoothing with  $FWHM = 13$*   
336 *mm (f and (g)).*

337

338 The results for the group-level fPET analyses for the three filtering techniques using the complete  
339 list-mode dataset ( $DF = 1$ ) are shown in Figure 4. A higher z-score range was observed for the  
340 group-level analyses compared to the single subject-level analysis. However, in contrast to the  
341 subject-level analysis, the timecourses estimated from all methods (Figures 4b, 4d & 4f) at the  
342 group level recapitulated the experimental design paradigm. The activation map corresponding to  
343 the MRI-MRF prior followed the known neuroanatomical representation of the primary visual  
344 cortex and was consistent with the subject-level result. On the other hand, the activation maps  
345 using the two Gaussian kernels did not represent activation in the primary visual cortex and  
346 demonstrated diffuse cerebral metabolic activity into large adjacent anatomical regions including  
347 the white matter.

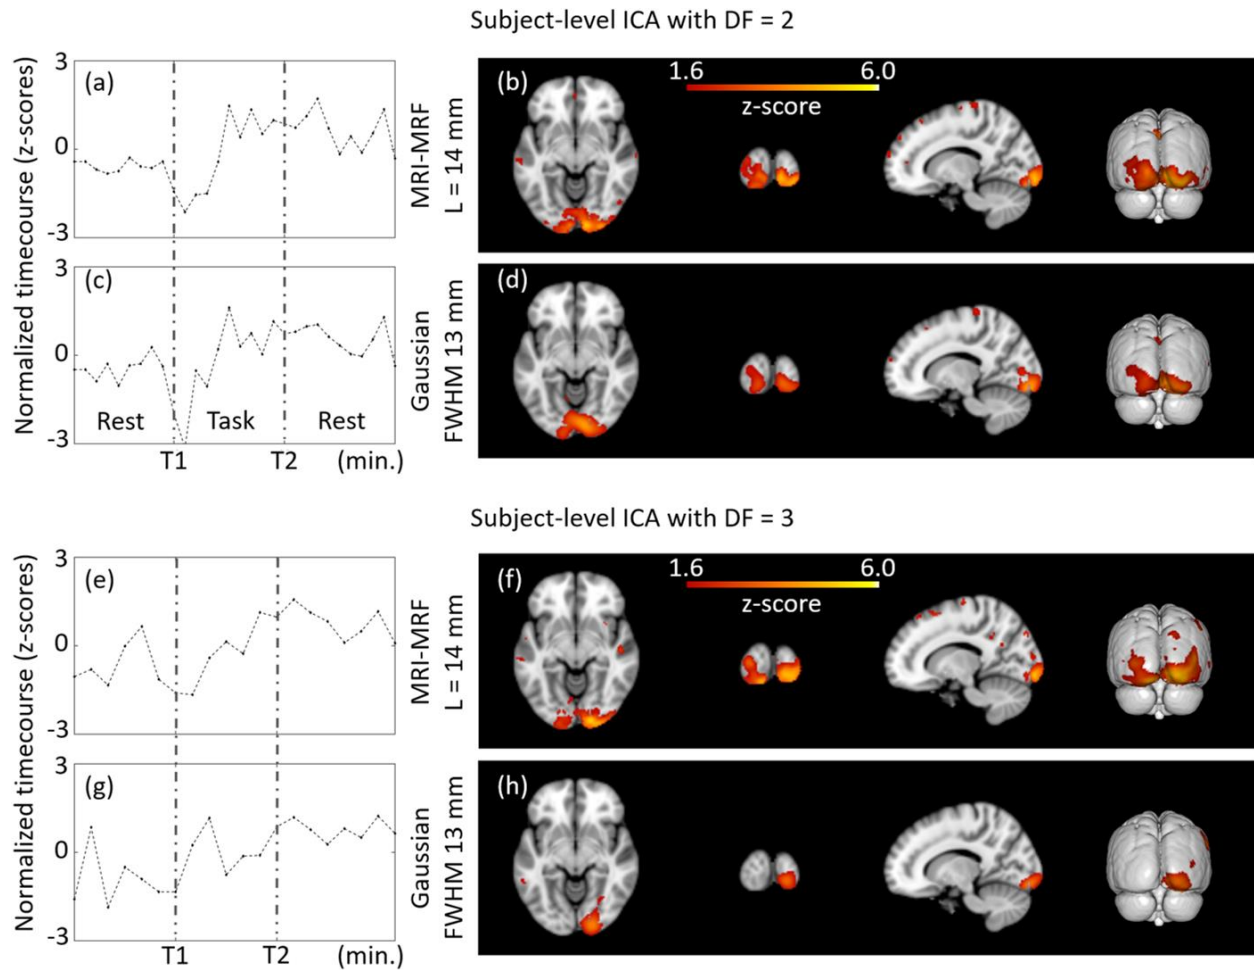

348

349 *Figure 5. Subject-level (representative) estimation of brain activations using the reduced task and*  
350 *resting blocks with DF = 2 and 3 at MNI co-ordinate (14, -94, -8). The independent components*  
351 *estimated from the filtered fPET images using different schemes are provided. DF = 2: MRI-MRF*  
352 *prior (b) and Gaussian kernel with FWHM 13 mm (d). DF = 3: MRI-MRF prior (f), and Gaussian*  
353 *smoothing with FWHM = 13 mm (h). The T1 and T2 represent the onsets of the task and second*  
354 *resting block, respectively.*

355

356 Figure 5 shows the subject-level fPET analyses for downsampling factors of two and three (DF =  
357 2 & 3). Timepoints T1 and T2 represent the onset of the task and second resting block in the  
358 downsampled task paradigm. Plausible ICA activation maps were not generated using an 11mm  
359 FWHM Gaussian kernel for both DFs and therefore no results are included. The ICA timecourses  
360 during the task-block for the MRI-MRF filter demonstrated a steadier gradual increase, in

361 agreement with the task paradigm, in comparison to the 13mm FWHM Gaussian kernel for DFs  
362 of 2 and 3 respectively (Figures 5a & 5e compared to Figures 5c & 5g respectively). The activation  
363 map axial view for DF = 3 did not reveal activation in the left hemisphere as was expected for the  
364 visual task (Figure 5h). However, for DF = 2 there was some activation in the left hemisphere  
365 visual cortex (Figure 5d) although it was not as widespread as for the fully sampled dataset. On  
366 the other hand, the activation maps for the MRI-MRF prior (Figures 5b & 5f) showed spatial  
367 congruency across the three DFs, whilst the discrepancy between the z-scores for the MRI-MRF  
368 prior and the 13 mm FWHM Gaussian filter was largest for DF =3 compared to DF = 2 and 1.

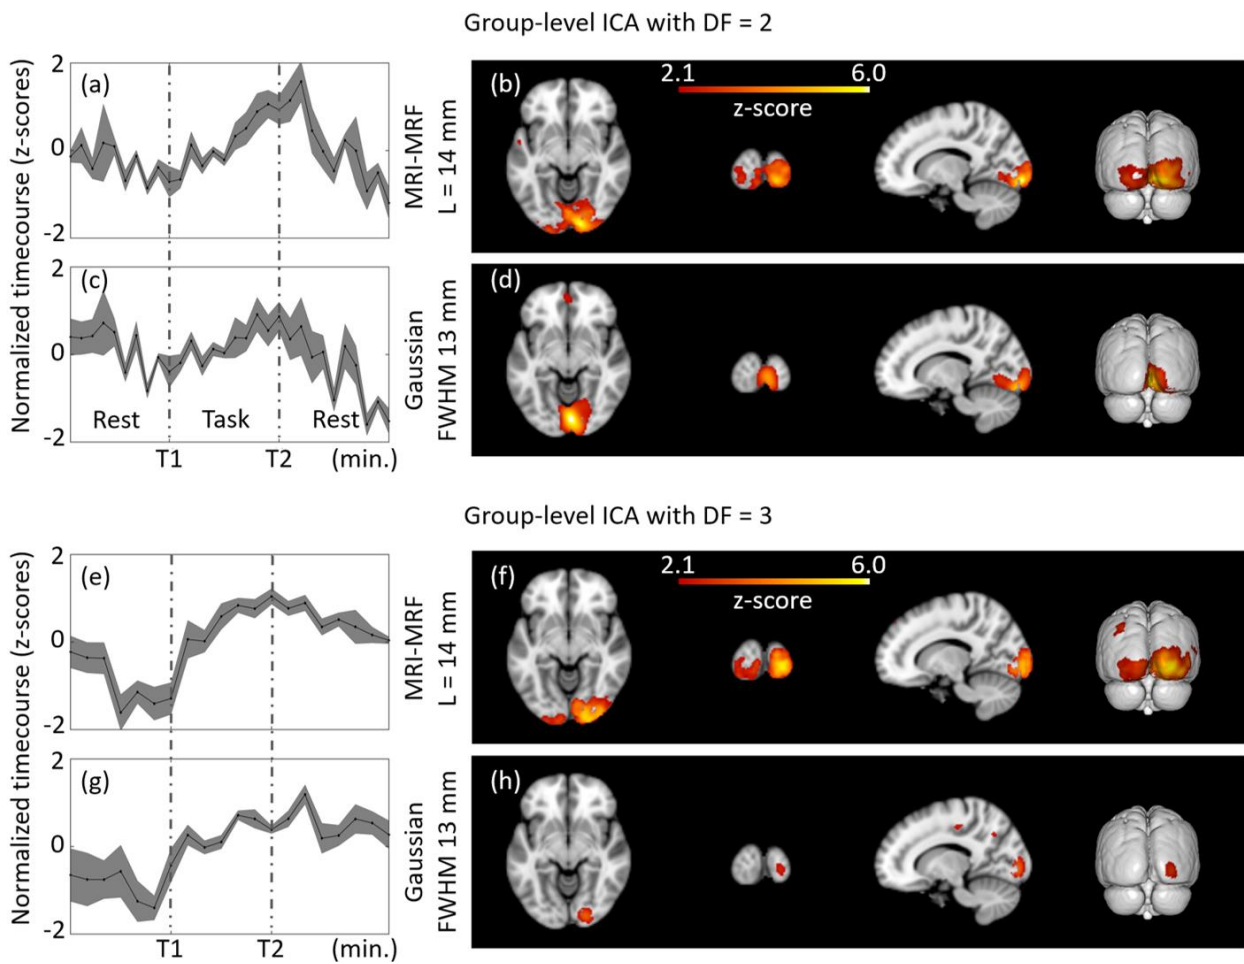

370 Figure 6. Group-level estimation of brain activations using the reduced task and resting blocks  
371 with DF = 2 and 3 at MNI co-ordinate (14, -94, -8). The ICA components estimated from the  
372 filtered fPET images using different schemes are provided. DF = 2: MRI-MRF prior (b) and

373 *Gaussian kernel with FWHM 13 mm (d). DF = 3: MRI-MRF prior (f), and Gaussian smoothing*  
374 *with FWHM = 13 mm (h).*

375 Figure 6 shows the group-level fPET analyses at  $DF = 2$  and  $DF = 3$ . In contrast to the group-level  
376 analysis for the fully sampled dataset where there was little difference between the activation maps  
377 estimated by the MRI-MRF method and the Gaussian kernel with FWHM 13 mm (Figure 4), the  
378 activation maps estimated for the group-level analyses for  $DF = 2$  and  $DF = 3$  showed marked  
379 differences. For both  $DF = 2$  and 3, the ICA timecourses for the MRI-MRF prior (Figures 6a & 6e)  
380 showed agreement with the task experimental design with higher z-scores than for the 13mm  
381 FWHM Gaussian filter timecourses (Figures 6c & 6g). The activation maps show that while the  
382 MRI-MRF prior was able to resolve brain activation that was consistent with activation of the  
383 visual cortex (Figures 6b & 6f), at both  $DF = 2$  and 3 the 13mm FWHM Gaussian filter was unable  
384 to resolve extended activation throughout the primary visual cortex (Figures 6d & 6h) with no  
385 activation in the left hemisphere for  $DF = 3$  (Figure 6h). Conversely, the activation maps for the  
386 MRI-MRF prior were congruent across the subject-level and group-level analyses although greater  
387 consistency in the right hemisphere.

388

#### 389 **4 Discussion**

390 We have proposed an MRI-assisted fPET processing framework for the analysis of task-related  
391 metabolic changes in the brain using high temporal resolution fPET data and for low-dose fPET  
392 brain mapping applications. We investigated the effect of using the anatomical information from  
393 a subject's MRI to denoise the fPET dataset to reduce the partial volume error in the PET images  
394 in order to increase the sensitivity of the ICA analysis. The PET image restoration problem was  
395 posed as a solution to a Bayesian optimization problem which was solved using L-BFGS due to  
396 its greater computational efficiency compared to gradient-descent based optimization techniques.

397 This study compared the post-reconstruction filtered images from the MRI-MRF method and  
398 Gaussian smoothing with varying kernel sizes as well as the ICA activation maps from the fPET  
399 dataset using a visual stimulation task. Visual assessment of the post-reconstruction smoothed  
400 images showed that the MRI-MRF processed PET images recovered many features which were  
401 not readily observed in the conventional low dose PET images. The MRI-MRF filtered PET  
402 images revealed localized tracer uptake in the sub-cortical nuclei adjacent to the lateral ventricles  
403 (e.g. Figure 2c) whereas little or no uptake was apparent in the comparable low-dose and Gaussian  
404 denoised PET images. Furthermore, the level of Gaussian smoothing required to obtain plausible  
405 activations in the visual cortex rendered the fPET image hard to interpret visually as there was a  
406 substantial loss of features. The MRI-MRF method provides a balance between visual  
407 interpretability of the fPET images together with improved resolution and sensitivity for functional  
408 analysis using ICA.

409 The task-based experimental design paradigm enabled meaningful comparison of the ICA  
410 timecourses obtained using the two filtering techniques, by inspection of the FDG uptake in the  
411 visual cortex during the visual stimulation task. The proposed methodology was able to achieve  
412 consistent activation maps at both the subject-level and group-level for  $DF = 1, 2$  and  $3$ . However,  
413 this was not true for the Gaussian smoothing kernels. Moreover, since the fPET data was acquired  
414 for an exogenous task-based stimulus, good correlation between the subject-level and group-level  
415 activation maps was expected. In particular, the improved results for the individual subject-level  
416 analysis demonstrates the benefit of the MRI-MRF method to enhance single subject-level analysis  
417 using low dose high temporal resolution fPET data with reduced task durations.

418 The study involving downsampling factors that demonstrated that the proposed processing pipeline  
419 could detect dynamic brain metabolic increases for visual task stimulation for as short as

420 approximately three minutes. However, this interpretation does assume that the FDG dosage per  
421 frame in the fPET images is consistent for the different downsampling factors. In practice this  
422 would be achievable experimentally by altering the infusion protocol or slightly increasing the  
423 dosage of the radiotracer (Verger & Guedj, 2018). The Gaussian smoothing technique failed to  
424 identify task related ICA components for the shorter task durations (i.e. at higher DFs) due to  
425 reduced sensitivity.

426 Unlike fMRI, fPET images suffer from very low SNR and hence the spatial denoising scheme  
427 must be carefully chosen to provide an optimal bias-variance trade-off. MRI-guided PET image  
428 denoising and deblurring has been extensively reported in the literature (Hutton et al., 2013; Song  
429 et al., 2019) with many solutions for post-reconstruction PET image enhancement. However, this  
430 paper is the first to demonstrate the effectiveness of the MRI-based spatial denoising technique for  
431 dynamic fPET imaging, such that fPET images are both visually interpretable and produce  
432 accurate functional maps with improved temporal resolution. The high specificity and sensitivity  
433 of the algorithm also enabled single subject-level analyses along with reasonable visualization of  
434 the fPET images without loss of anatomical details. Traditional methods such as Gaussian  
435 smoothing perform averaging without consideration of the anatomical boundaries and hence the  
436 quantitative accuracy of FDG signals is degraded by partial volume errors. This was reflected in  
437 the diffuse visual activation maps obtained with the Gaussian filtering. Using edge-preserving  
438 denoising techniques such as anisotropic filtering would also yield suboptimal performance  
439 because of the poor SNR of the fPET images and the difficulty to distinguish between tissue  
440 boundaries and noise.

441 The formulation of the MRI-MRF prior in this work is generic and allows for modelling of higher-  
442 level image features such as dictionary atoms. Nevertheless, the proposed filtering framework is

443 efficient and computationally less expensive in comparison to other patch-based techniques and  
444 hence, the framework is easier to adapt for other research and clinical applications.

445 Although the MRI-MRF prior in this work was applied in the image domain on post-reconstructed  
446 fPET images, the same could be applied within the image reconstruction process provided the PET  
447 list-mode data was accessible. Research using image restoration techniques in a reconstruction  
448 framework generally employ a Poisson noise model for the sinogram data and a system matrix  
449 composed of several matrix operations representing the point spread function, forward projection,  
450 attenuation correction, scatter correction, and back projection. Our work solved the image  
451 restoration problem in the image domain and employed a least-squares-type data term rather than  
452 a fixed noise-model in the image space. This was because the noise characteristics of the  
453 reconstructed PET images inherently depend on the reconstruction algorithm. For example, noise  
454 characteristics during filtered back projection reconstruction depend upon the filter employed,  
455 whilst in maximum likelihood expectation maximisation reconstruction and its variants, the noise  
456 characteristics depend on the number of iterations as well as the strength of the prior function.

457 The current work has a number of limitations. One of the limitations is the small sample size. In  
458 this work, we show proof of the principle for utilizing anatomical information for fPET data  
459 processing. Advanced statistical image restoration models such as joint patch-based techniques  
460 and neural networks may further improve the image quality for shorter image acquisition durations  
461 and potentially in future approach the temporal resolution offered by fMRI. However, the proposed  
462 framework is readily adaptable to use these techniques in the research context although modelling  
463 higher statistical dependencies would increase the number of hyperparameters that were required  
464 to be tuned. A further limitation is that the MRI-MRF modelled as a Bowsher-like prior may be  
465 perceived as a technique that relies excessively on the anatomical modality. Although this may be



466 relatively unimportant or in fact beneficial in the case of tracers like FDG that are widely  
467 distributed throughout the brain, this may not be the case for other heterogeneously distributed  
468 tracers such as for amyloid PET imaging. More sophisticated image restoration models which  
469 maintain a balance between the PET and MRI features for each tracer may need to be incorporated  
470 at the cost of more computational time. The use of spatial regularization could be carefully  
471 extended to include a temporal smoothing constraint governed by studies in tracer kinetics. A  
472 comprehensive study of several MRI-PET joint priors in the context of dynamic functional PET  
473 denoising and analytical techniques is an important direction for future studies.

## 474 **5 Conclusion**

475 We have presented a novel MRI-assisted fPET processing framework for functional analysis of  
476 fPET data at high temporal resolution and for low doses of radiotracer. Compared to traditional  
477 Gaussian smoothing, our approach yields visually interpretable PET images while increasing the  
478 sensitivity and anatomical accuracy of activation maps estimated using ICA. Through validation  
479 using simulated data, we have demonstrated that the MRI-MRF method is able to accurately  
480 estimate visual task related brain activation maps even under poor SNR conditions. The application  
481 to *in vivo* fPET data demonstrated that the MRI-MRF prior achieves detection of reduced task  
482 durations of approximately three minutes and provides an avenue for further increases in the  
483 temporal resolution and sensitivity of both single subject and group-level brain metabolic mapping  
484 studies.

485

## 486 **Acknowledgements**

487

488 The authors are grateful to Richard McIntyre and Alexandra Carey for organizing the scanning  
489 protocol. We thank Edwina Orchard, Irene Graafsma and Disha Sasan in the assistance of data  
490 collection, and Phillip Ward for useful discussions. We acknowledge the provision of Siemens  
491 e7tools used for reconstruction of the PET images.

492 This work was supported by an Australian Research Council (ARC) Linkage Project  
493 (LP170100494) to G.F. Egan, S.D. Jamadar & Z. Chen which includes financial support from  
494 Siemens Healthineers. S. Li and Z. Chen are supported by funding from Reignwood Cultural  
495 Foundation. G.F. Egan & S.D. Jamadar are supported by the ARC Centre of Excellence for  
496 Integrative Brain Function (CE140100007). S.D. Jamadar is supported by a National Health and  
497 Medical Research Council of Australia Fellowship (APP1174164). S.P. Awate is supported by the  
498 Infrastructure Facility for Advanced Research and Education in Diagnostics grant funded by  
499 Department of Biotechnology (DBT), Government of India (BT/INF/22/SP23026/2017).

## 500 Reference

- 501
- 502 A. Hyvarinen, & E. Oja. (2000). Independent component analysis: algorithms and applications.  
503 *Neural Networks*, 13, 411–430.
- 504 Avants, B. B., Nicholas, T. J., Song, G., Cook, P. A., Klein, A., & Gee, J. C. (2011). A  
505 reproducible evaluation of ANTs similarity metric performance in brain image registration.  
506 *NeuroImage*, 54(3), 2033–2044. <https://doi.org/10.1016/j.neuroimage.2010.09.025>
- 507 Awate, S. P., & Whitaker, R. T. (2005a). Higher-order image statistics for unsupervised,  
508 information-theoretic, adaptive, image filtering. In *IEEE Computer Society Conference on*  
509 *Computer Vision and Pattern Recognition (CVPR)* (Vol. II, pp. 44–51).  
510 <https://doi.org/10.1109/CVPR.2005.176>
- 511 Awate, S. P., & Whitaker, R. T. (2005b). Nonparametric Neighborhood Statistics for MRI  
512 Denoising. In *Information Processing in Medical Imaging (IPMI)* (Vol. 13, pp. 177–186).
- 513 Awate, S. P., & Whitaker, R. T. (2006). Unsupervised, Information-Theoretic, Adaptive Image  
514 Filtering for Image Restoration. *IEEE TRANSACTIONS ON PATTERN ANALYSIS AND*  
515 *MACHINE INTELLIGENCE*, 28(3), 364–376.
- 516 Awate, S. P., & Whitaker, R. T. (2007). Feature-preserving MRI denoising: A nonparametric  
517 empirical bayes approach. *IEEE Transactions on Medical Imaging*, 26(9), 1242–1255.  
518 <https://doi.org/10.1109/TMI.2007.900319>
- 519 Baran, J., Chen, Z., Sforazzini, F., Ferris, N., Jamadar, S., Schmitt, B., ... Egan, G. F. (2018).

- 520 Accurate hybrid template-based and MR-based attenuation correction using UTE images for  
521 simultaneous PET/MR brain imaging applications. *BMC Medical Imaging*, 18(1), 1–16.  
522 <https://doi.org/10.1186/s12880-018-0283-3>
- 523 Biguri, A., Dosanjh, M., Hancock, S., & Soleimani, M. (2016). TIGRE: A MATLAB-GPU  
524 toolbox for CBCT image reconstruction. *Biomedical Physics and Engineering Express*,  
525 2(5). <https://doi.org/10.1088/2057-1976/2/5/055010>
- 526 Bousse, A., Pedemonte, S., Thomas, B. A., Erlandsson, K., Ourselin, S., Arridge, S., & Hutton,  
527 B. F. (2012). Markov random field and Gaussian mixture for segmented MRI-based partial  
528 volume correction in PET. *Physics in Medicine and Biology*, 57(20), 6681–6705.  
529 <https://doi.org/10.1088/0031-9155/57/20/6681>
- 530 Bowsher, J., Johnson, V., Turkington, T., Jaszczak, R., Floyd, C., & Coleman, R. (1996).  
531 Bayesian Reconstruction and Use of Anatomical A Priori Information for Emission  
532 Tomography. *IEEE Transactions on Medical Imaging*, 15(5), 673–686.
- 533 Buades, A., Coll, B., & Morel, J. M. (2005). A non-local algorithm for image denoising. In *IEEE*  
534 *Computer Society Conference on Computer Vision and Pattern Recognition (CVPR)* (Vol.  
535 II, pp. 60–65). <https://doi.org/10.1109/CVPR.2005.38>
- 536 Burgos, N., Cardoso, M. J., Modat, M., Pedemonte, S., Dickson, J., Barnes, A., ... Ourselin, S.  
537 (2013). Attenuation correction synthesis for hybrid PETMR scanners. In *International*  
538 *Conference on Medical Image Computing and Computer-Assisted Intervention, (MICCAI)*  
539 (Vol. 1, pp. 147–154). <https://doi.org/10.1186/2197-7364-1-S1-A52>
- 540 Byrd, R., Lu, P., Nocedal, J., & Zhu, C. (1995). A Limited Memory Algorithm for Bound  
541 Constrained Optimization. *SIAM Journal of Scientific Computing*, 16(5), 1190–1208.  
542 <https://doi.org/10.1137/0916069>
- 543 Chen, Z, Jamadar, S., Li, S., Sforzazzini, F., Baran, J., Ferris, N., ... Egan, G. (2018). From  
544 simultaneous to synergistic MR-PET brain imaging: A review of hybrid MR-PET imaging  
545 methodologies. *Hum Brain Mapp.*, 39(12), 5126.
- 546 Chen, Zikuan, & Calhoun, V. (2018). Effect of spatial smoothing on task fMRI ICA and  
547 functional connectivity. *Frontiers in Neuroscience*, 12(FEB), 1–10.  
548 <https://doi.org/10.3389/fnins.2018.00015>
- 549 Coupé, P., Manjón, J. V., Robles, M., & Collins, D. L. (2012). Adaptive multiresolution non-  
550 local means filter for three-dimensional magnetic resonance image denoising. *IET Image*  
551 *Processing*, 6(5), 558–568. <https://doi.org/10.1049/iet-ipr.2011.0161>
- 552 Diedrichsen, J., Balsters, J. H., Flavell, J., Cussans, E., & Ramnani, N. (2009). A probabilistic  
553 MR atlas of the human cerebellum. *NeuroImage*, 46(1), 39–46.  
554 <https://doi.org/10.1016/j.neuroimage.2009.01.045>
- 555 Dutta, J., Leahy, R. M., & Li, Q. (2013). Non-local means denoising of dynamic PET images.  
556 *PLoS ONE*, 8(12). <https://doi.org/10.1371/journal.pone.0081390>
- 557 Ehrhardt, M. J., Thielemans, K., Pizarro, L., Atkinson, D., Ourselin, S., Hutton, B. F., & Arridge,  
558 S. R. (2015). Joint reconstruction of PET-MRI by exploiting structural similarity. *Inverse*  
559 *Problems*, 31(1), 015001. <https://doi.org/10.1088/0266-5611/31/1/015001>
- 560 Figley, C. R., & Stroman, P. W. (2011). The role(s) of astrocytes and astrocyte activity in  
561 neurometabolism, neurovascular coupling, and the production of functional neuroimaging  
562 signals. *European Journal of Neuroscience*, 33(4), 577–588. [https://doi.org/10.1111/j.1460-](https://doi.org/10.1111/j.1460-9568.2010.07584.x)  
563 [9568.2010.07584.x](https://doi.org/10.1111/j.1460-9568.2010.07584.x)
- 564 Hahn, A., Gryglewski, G., Nics, L., Hienert, M., Rischka, L., Vranka, C., ... Lanzenberger, R.  
565 (2016). Quantification of task-specific glucose metabolism with constant infusion of 18F-

- 566 FDG. *Journal of Nuclear Medicine*, 57(12), 1933–1940.  
567 <https://doi.org/10.2967/jnumed.116.176156>
- 568 Hahn, A., Gryglewski, G., Nics, L., Rischka, L., Ganger, S., Sigurdardottir, H., ... Lanzenberger,  
569 R. (2018). Task-relevant brain networks identified with simultaneous PET/MR imaging of  
570 metabolism and connectivity. *Brain Structure and Function*, 223(3), 1369–1378.  
571 <https://doi.org/10.1007/s00429-017-1558-0>
- 572 Hutton, B. F., Thomas, B. A., Erlandsson, K., Bousse, A., Reilhac-Laborde, A., Kazantsev,  
573 D., ... Ourselin, S. (2013). What approach to brain partial volume correction is best for  
574 PET/MRI? *Nuclear Instruments and Methods in Physics Research A*, 702, 29–33.  
575 <https://doi.org/10.1016/j.nima.2012.07.059>
- 576 Hyvärinen, A., & Oja, E. (1997). A Fast Fixed-Point Algorithm for Independent Component  
577 Analysis. *Neural Computation*, 9(7), 1483–1492.  
578 <https://doi.org/10.1162/neco.1997.9.7.1483>
- 579 Jamadar, S. D., Ward, P. G., Li, S., Sforazzini, F., Baran, J., Chen, Z., & Egan, G. F. (2019).  
580 Simultaneous task-based BOLD-fMRI and [18-F] FDG functional PET for measurement of  
581 neuronal metabolism in the human visual cortex. *NeuroImage*, 189(December 2018), 258–  
582 266. <https://doi.org/10.1016/j.neuroimage.2019.01.003>
- 583 Kim, K., Wu, D., Gong, K., Dutta, J., Kim, J. H., Son, Y. D., ... Li, Q. (2018). Penalized PET  
584 Reconstruction Using Deep Learning Prior and Local Linear Fitting. *IEEE Transactions on*  
585 *Medical Imaging*, 37(6), 1478–1487. <https://doi.org/10.1109/TMI.2018.2832613>
- 586 Li, S., Jamadar, S. D., Ward, P. G. D., Premaratne, M., Egan, G. F., & Chen, Z. (2020). Analysis  
587 of continuous infusion functional PET (fPET) in the human brain. *NeuroImage*,  
588 213(March), 116720. <https://doi.org/10.1016/j.neuroimage.2020.116720>
- 589 Loeb, R., Navab, N., & Ziegler, S. (2015). Direct Parametric Reconstruction Using Anatomical  
590 Regularization for Simultaneous PET/MRI Data. *IEEE Transactions on Medical Imaging*,  
591 34(11), 2233–2247.
- 592 Lucignani, G., Schmidt, K. C., Moresco, R. M., Striano, G., Colombo, F., Sokoloff, L., & Fazio,  
593 F. (1993). Measurement of regional cerebral glucose utilization with fluorine-18-FDG and  
594 PET in heterogeneous tissues: Theoretical considerations and practical procedure. *Journal*  
595 *of Nuclear Medicine*, 34(3), 360–369.
- 596 Mazziotta, J., Toga, A., Evans, A., Fox, P., Lancaster, J., Zilles, K., ... Mazoyer, B. (2001). A  
597 probabilistic atlas and reference system for the human brain: International Consortium for  
598 Brain Mapping (ICBM). *Philosophical Transactions of the Royal Society B: Biological*  
599 *Sciences*, 356(1412), 1293–1322. <https://doi.org/10.1098/rstb.2001.0915>
- 600 Milanfar, P. (2012). A Tour of Modern Image Filtering: New Insights and Methods, Both  
601 Practical and Theoretical. *IEEE Signal Processing Magazine*, 30(1), 106–128.  
602 <https://doi.org/10.1109/msp.2011.2179329>
- 603 Nasrallah, I., & Dubroff, J. (2013). An overview of PET neuroimaging. *Seminars in Nuclear*  
604 *Medicine*, 43(6), 449–461. <https://doi.org/10.1053/j.semnuclmed.2013.06.003>
- 605 Phelps, M. E., Huang, S. C., Hoffman, E. J., Selin, C., Sokoloff, L., & Kuhl, D. E. (1979).  
606 Tomographic measurement of local cerebral glucose metabolic rate in humans with (F-  
607 18)2-fluoro-2-deoxy-D-glucose: Validation of method. *Annals of Neurology*, 6(5), 371–388.  
608 <https://doi.org/10.1002/ana.410060502>
- 609 Pignat, J. M., Koval, O., Van De Ville, D., Voloshynovskiy, S., Michel, C., & Pun, T. (2013).  
610 The impact of denoising on independent component analysis of functional magnetic  
611 resonance imaging data. *Journal of Neuroscience Methods*, 213(1), 105–122.

- 612 <https://doi.org/10.1016/j.jneumeth.2012.10.011>
- 613 Reivich, M., Alavi, A., Wolf, A., Fowler, J., Russell, J., Arnett, C., ... Anand, A. (1985).  
614 Glucose metabolic rate kinetic model parameter determination in humans: The lumped  
615 constants and rate constants for [18F]fluorodeoxyglucose and [11C]deoxyglucose. *Journal*  
616 *of Cerebral Blood Flow and Metabolism*, 5(2), 179–192.  
617 <https://doi.org/10.1038/jcbfm.1985.24>
- 618 Rischka, L., Gryglewski, G., Pfaff, S., Vanicek, T., Hienert, M., Klöbl, M., ... Hahn, A. (2018).  
619 Reduced task durations in functional PET imaging with [18F]FDG approaching that of  
620 functional MRI. *NeuroImage*, 181(June), 323–330.  
621 <https://doi.org/10.1016/j.neuroimage.2018.06.079>
- 622 Schramm, G., Holler, M., Rezaei, A., Vunckx, K., Knoll, F., Bredies, K., ... Nuyts, J. (2018).  
623 Evaluation of Parallel Level Sets and Bowsher’s Method as Segmentation-Free Anatomical  
624 Priors for Time-of-Flight PET Reconstruction. *IEEE Transactions on Medical Imaging*,  
625 37(2), 590–603.
- 626 Song, T.-A., Yang, F., Chowdhury, S. R., Kim, K., Johnson, K. A., El Fakhri, G., ... Dutta, J.  
627 (2019). PET Image Deblurring and Super-Resolution With an MR-Based Joint Entropy  
628 Prior. *IEEE Transactions on Computational Imaging*, 5(4), 530–539.  
629 <https://doi.org/10.1109/tci.2019.2913287>
- 630 Sudarshan, V.P., Chen, Z., & Awate, S. P. (2018). Joint PET+MRI patch-based dictionary for  
631 bayesian random field PET reconstruction. In *International Conference on Medical Image*  
632 *Computing and Computer-Assisted Intervention (MICCAI)* (Vol. 11070 LNCS).  
633 [https://doi.org/10.1007/978-3-030-00928-1\\_39](https://doi.org/10.1007/978-3-030-00928-1_39)
- 634 Sudarshan, Viswanath P., Egan, G. F., Chen, Z., & Awate, S. P. (2020). Joint PET-MRI image  
635 reconstruction using a patch-based joint-dictionary prior. *Medical Image Analysis*, 62,  
636 101669. <https://doi.org/10.1016/j.media.2020.101669>
- 637 Verger, A., & Guedj, E. (2018). The renaissance of functional 18F-FDG PET brain activation  
638 imaging. *European Journal of Nuclear Medicine and Molecular Imaging*, 45(13), 2338–  
639 2341. <https://doi.org/10.1007/s00259-018-4165-2>
- 640 Villien, M., Wey, H. Y., Mandeville, J. B., Catana, C., Polimeni, J. R., Sander, C. Y., ... Hooker,  
641 J. M. (2014). Dynamic functional imaging of brain glucose utilization using fPET-FDG.  
642 *NeuroImage*, 100, 192–199. <https://doi.org/10.1016/j.neuroimage.2014.06.025>
- 643 Zhu, Y., Gao, Y., & Rahmim, A. (2019). Subtle MR guidance for Partial Volume Correction of  
644 PET Images: A Comparison of Techniques. In *IEEE Nuclear Science Symposium and*  
645 *Medical Imaging Conference (NSS/MIC)* (Vol. C, pp. 2–4).  
646 <https://doi.org/10.1109/NSS/MIC42101.2019.9059649>
- 647
