# Supplementary material for: Improved temporal resolution for mapping brain metabolism using functional PET and anatomical MRI knowledge
Source: bioRxiv or medRxiv preprint supplement (doi:10.1101/2020.07.08.192872), 2020-07-09
Supplement: Supplementary file [file media-1.pdf]

1 **Improved temporal resolution for mapping brain metabolism using functional PET and**  
2 **anatomical MRI knowledge**

3 Viswanath P. Sudarshan, Shengpeng Li, Sharna D. Jamadar, Gary F. Egan, Suyash P. Awate and  
4 Zhaolin Chen

5  
6 **Supplementary Results**

7  
8 **ICA Results**

9 In the main text, we reported the results of the visual task components obtained both at subject-  
10 level and group-level from the proposed MRI-MRF prior and Gaussian smoothing. Here we  
11 provide all the comparisons across different slices for both the methods.

12 Supplementary Figures 1 – 4 compares the visual task components for MRI-MRF prior and the  
13 Gaussian smoothing with FWHM 13 mm. At all the DFs, for most of the axial slices, the MRI-  
14 MRF prior shows activation which closely follows the anatomy of the visual cortex. In slices where  
15 there is increased activation shown by the MRI-MRF prior, results from Gaussian smoothing  
16 shows a large blob of activation around the visual cortex but extends to other anatomical regions.  
17 At  $DF = 1$  and  $2$ , the Gaussian filter shows activations which do not appear localized in the visual  
18 cortex region. At  $DF = 3$ , Gaussian smoothing does not provide activation which can be concluded  
19 as task related activations in the visual cortex.

20

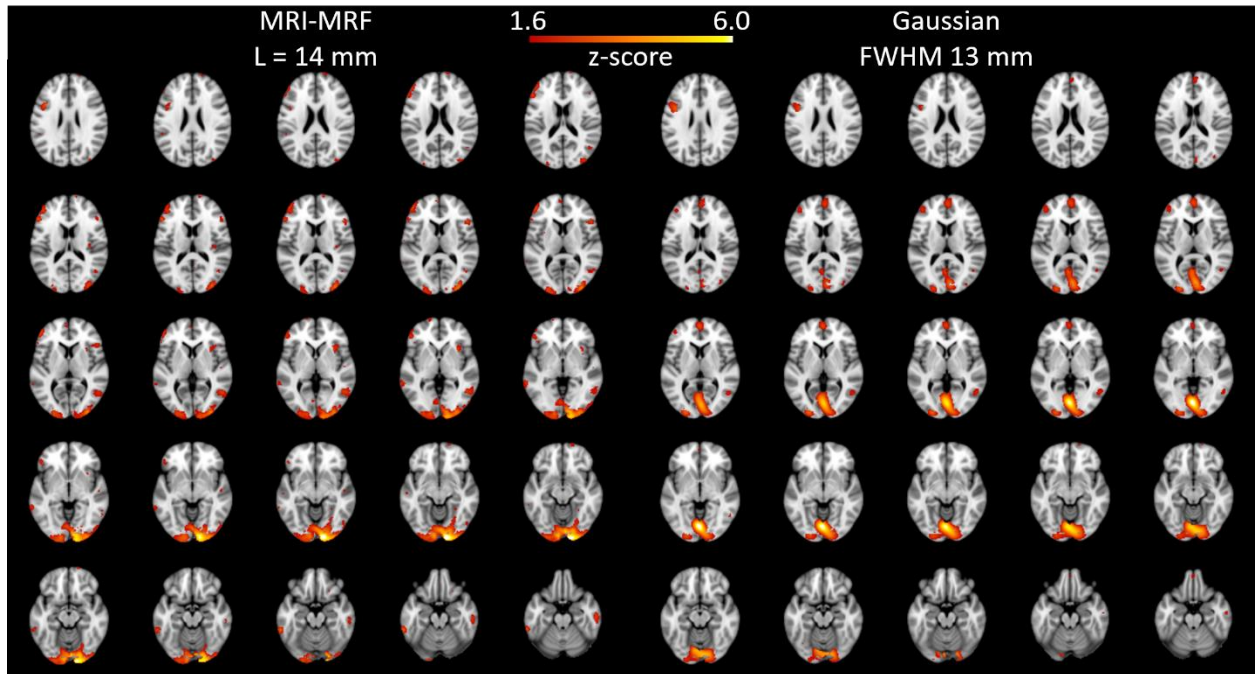

21

22 Supplementary Figure 1 Subject-level ICA at DF = 1. Comparison of visual task component  
23 across slices for MRI-MRF (left) and Gaussian filter (right) with FWHM 13 mm.

24

25

26

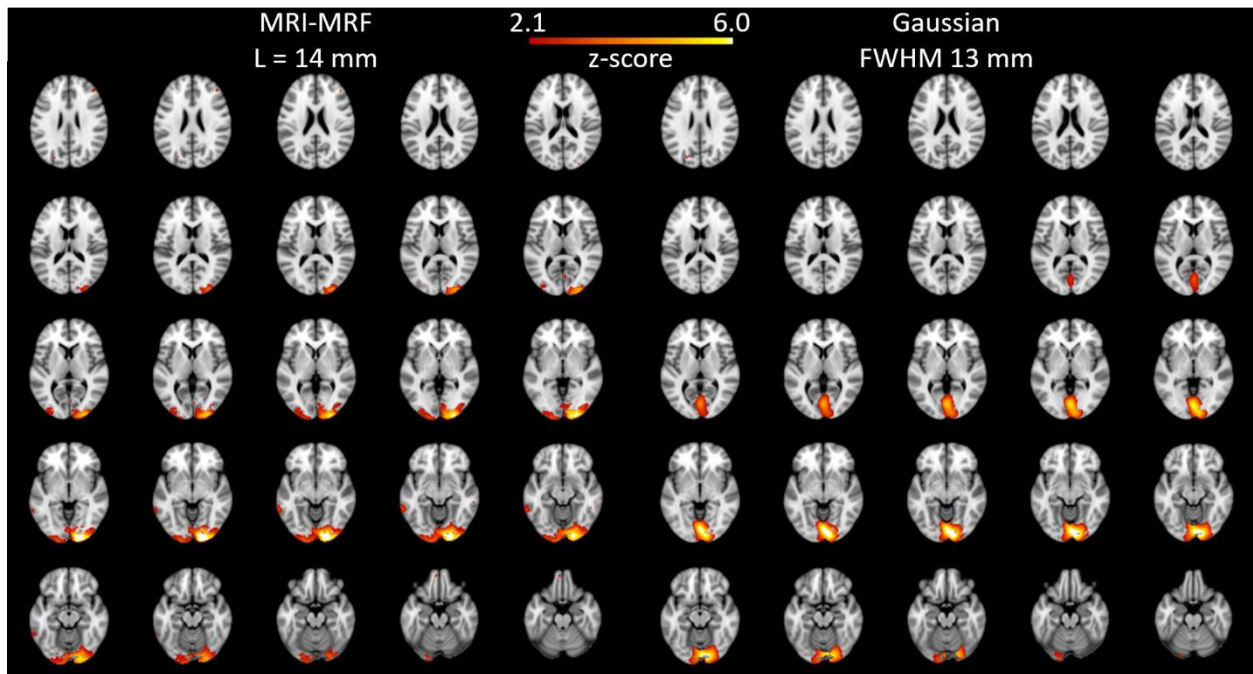

27

28 Supplementary Figure 2 Group-level ICA at  $DF = 1$ . Comparison of visual task component  
 29 across slices for MRI-MRF (left) and Gaussian filter (right) with FWHM 13 mm.

30

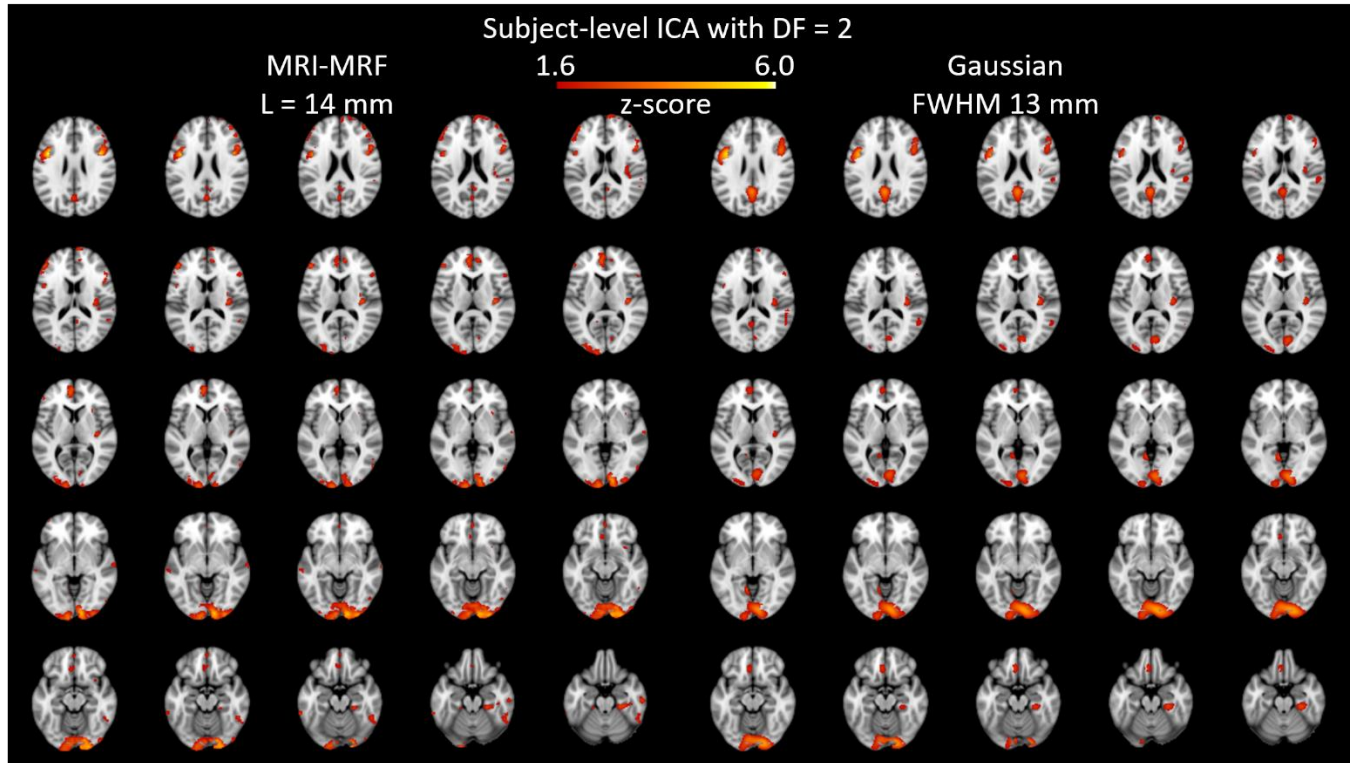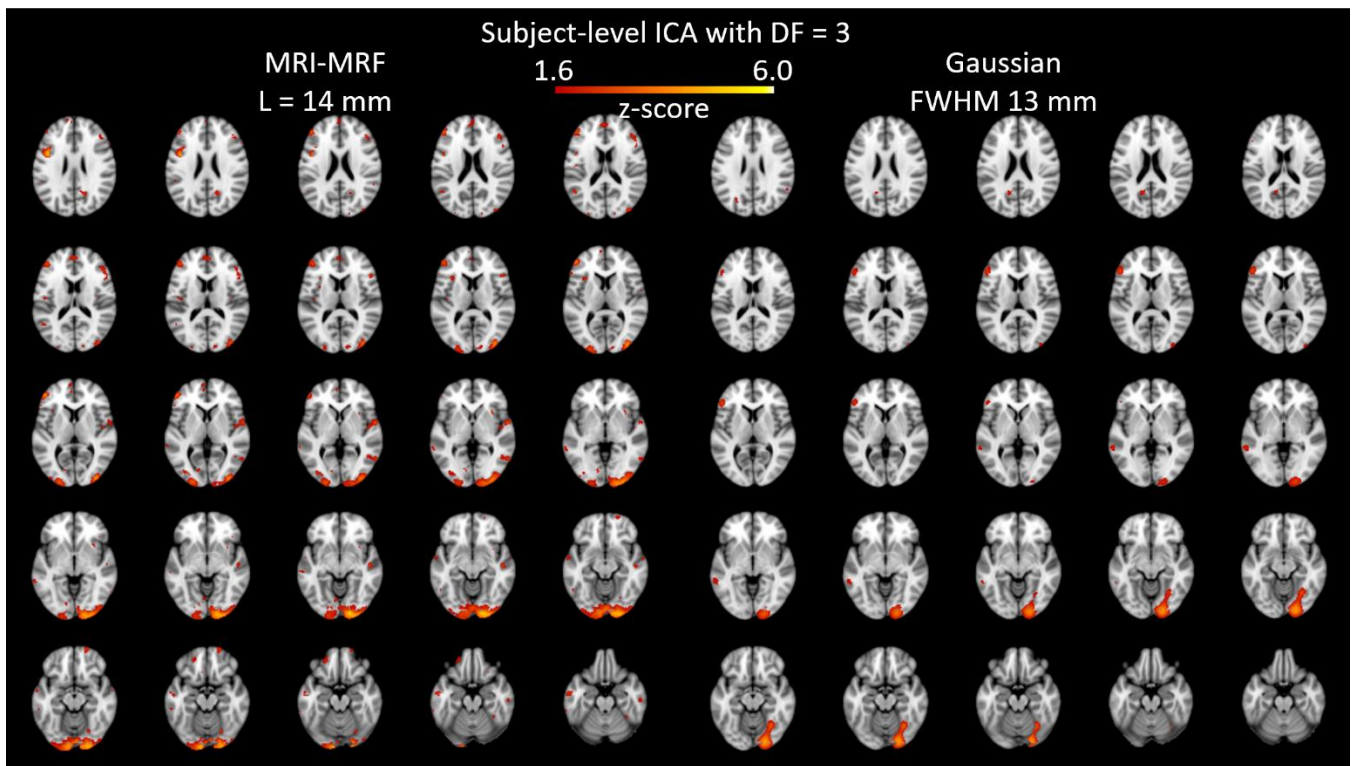

31

32 Supplementary Figure 3 Comparison of subject-level ICA between MRI-MRF prior and  
 33 Gaussian smoothing at DF = 2 (top) and 3 (bottom).

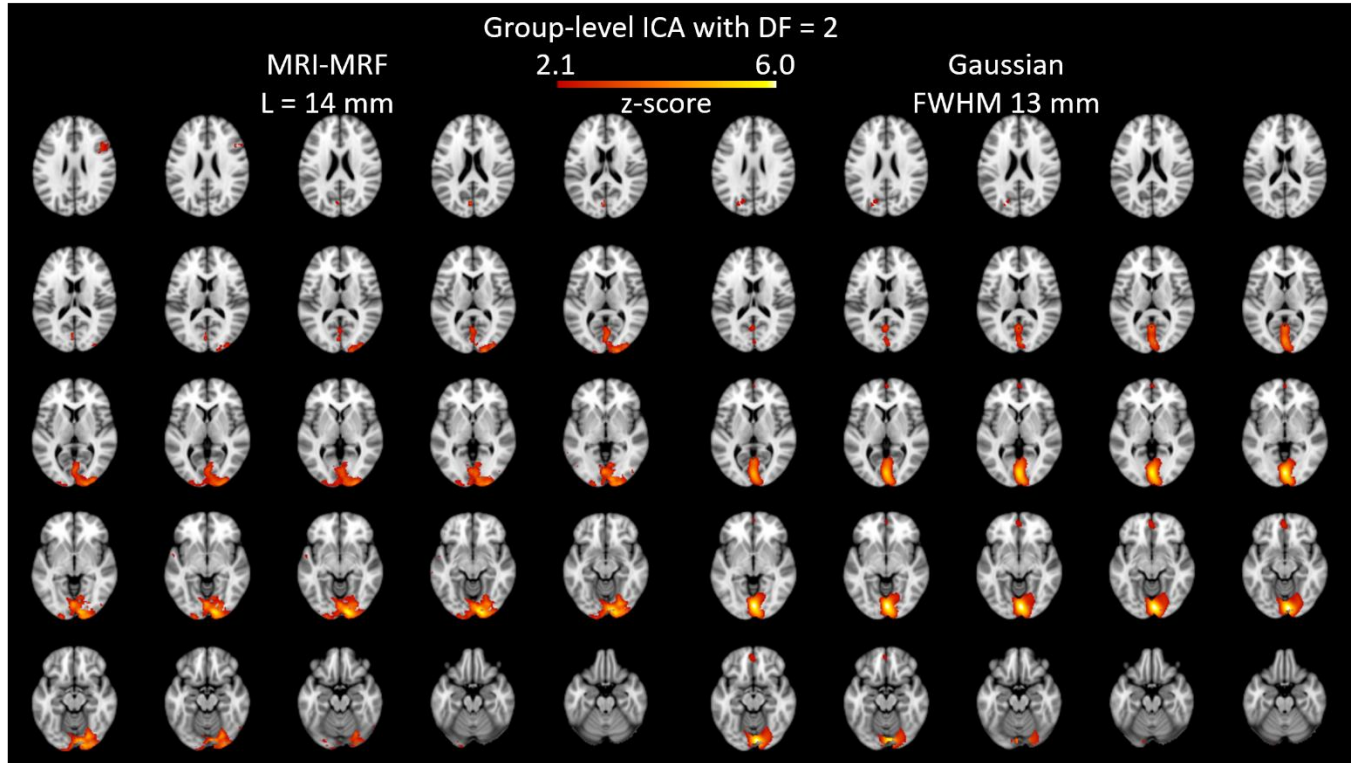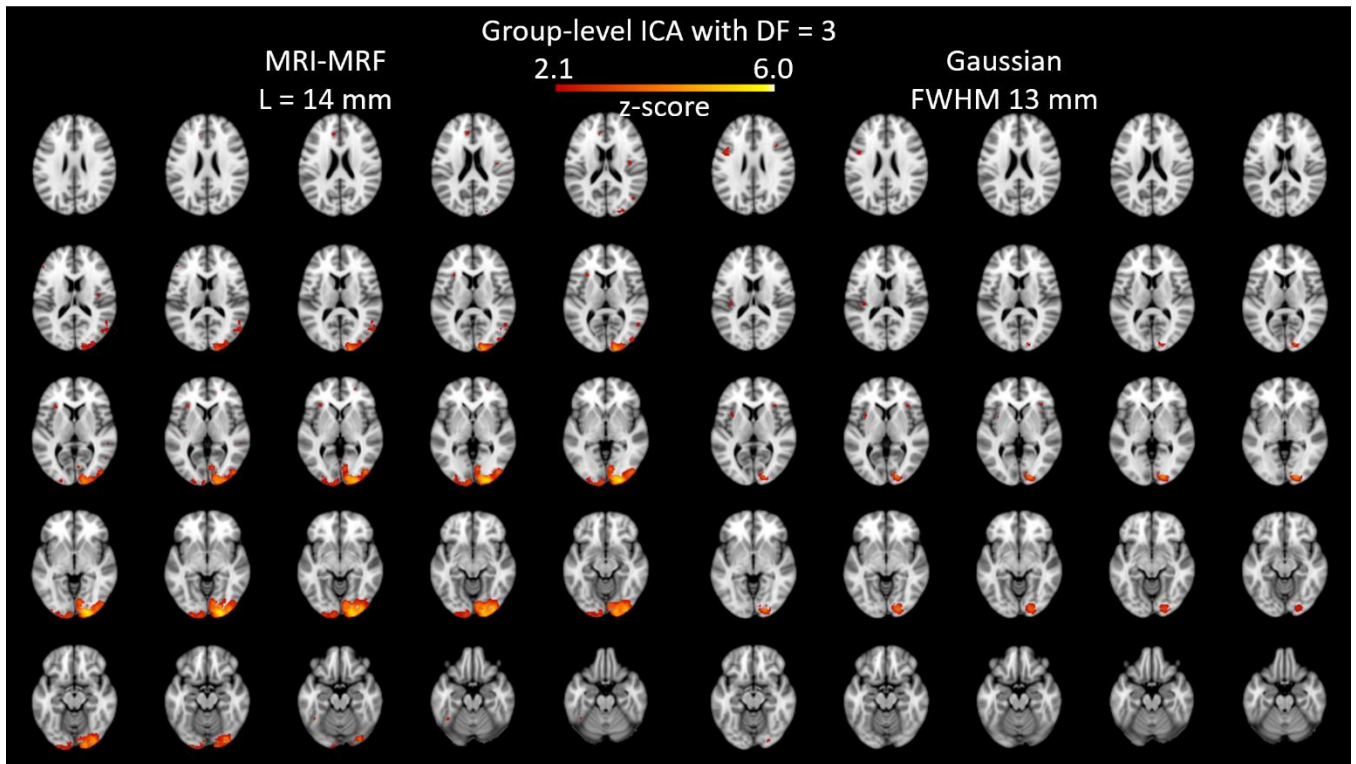

34

35 Supplementary Figure 4 Comparison of group-level ICA between MRI-MRF prior and Gaussian  
 36 smoothing at DF = 2 (top) and 3 (bottom).
